# Supplementary material for: Prediction of N-Methyl-D-Aspartate Receptor GluN1-Ligand Binding Affinity by a Novel SVM-Pose/SVM-Score Combinatorial Ensemble Docking Scheme
Source: PubMed Central journal article supplement (PMC5216401; doi:10.1038/srep40053), 2017-01-06
Supplement: srep40053-s1.pdf [file srep40053-s1.pdf]

Prediction of *N*-Methyl-D-Aspartate Receptor  
GluN1-Ligand Binding Affinity by a Novel  
SVM-Pose/SVM-Score Combinatorial  
Ensemble Docking Scheme

**Supplementary Information**

Max K. Leong<sup>1,2\*</sup>, Ren-Guei Syu<sup>1</sup>, Yi-Lung Ding<sup>1</sup>, and Ching-Feng Weng<sup>2\*</sup>

<sup>1</sup>Department of Chemistry, National Dong Hwa University, Shoufeng, Hualien 97401,  
Taiwan

<sup>2</sup>Department of Life Science and Institute of Biotechnology, National Dong Hwa  
University, Shoufeng, Hualien 97401, Taiwan

\*Correspondence: Max Leong, leong@mail.ndhu.edu.tw; Ching-Feng Weng,  
cfweng@mail.ndhu.edu.tw

Table S1. Statistic parameters and their definitions.

| Parameter               | Definition <sup>†</sup>                                                                                                                                                                                                                                                                                                                                  |
|-------------------------|----------------------------------------------------------------------------------------------------------------------------------------------------------------------------------------------------------------------------------------------------------------------------------------------------------------------------------------------------------|
| $r^2$                   | $1 - \frac{\sum_{i=1}^{n_{\text{TR}}} (\hat{y}_i - y_i)^2}{\sum_{i=1}^{n_{\text{TR}}} (y_i - \langle \hat{y} \rangle)^2}$                                                                                                                                                                                                                                |
| $q^2$                   | $1 - \frac{\sum_{i=1}^{n_{\text{EXT}}} (\hat{y}_i - y_i)^2}{\sum_{i=1}^{n_{\text{EXT}}} (y_i - \langle \hat{y} \rangle)^2}$                                                                                                                                                                                                                              |
| $q_{\text{CV}}^2$       | the correlation coefficient of 10-fold cross validation                                                                                                                                                                                                                                                                                                  |
| $\Delta_i$              | $y_i - \hat{y}_i$                                                                                                                                                                                                                                                                                                                                        |
| RMSE                    | $\left( \frac{\sum_{i=1}^n \Delta_i^2}{n} \right)^{1/2}$                                                                                                                                                                                                                                                                                                 |
| MAE                     | $\frac{1}{n} \sum_{i=1}^n  \Delta_i $                                                                                                                                                                                                                                                                                                                    |
| $r_m^2$                 | $r^2 \left( 1 - \sqrt{ r^2 - r_o^2 } \right)$                                                                                                                                                                                                                                                                                                            |
| $r_m'^2$                | $r^2 \left( 1 - \sqrt{ r^2 - r_o'^2 } \right)$                                                                                                                                                                                                                                                                                                           |
| $\langle r_m^2 \rangle$ | $(r_m^2 + r_m'^2) / 2$                                                                                                                                                                                                                                                                                                                                   |
| $q_{\text{F1}}^2$       | $1 - \frac{\sum_{i=1}^{n_{\text{EXT}}} (y_i - \hat{y}_i)^2}{\sum_{i=1}^{n_{\text{EXT}}} (y_i - \langle y_{\text{TR}} \rangle)^2}$                                                                                                                                                                                                                        |
| $q_{\text{F2}}^2$       | $1 - \frac{\sum_{i=1}^{n_{\text{EXT}}} (y_i - \hat{y}_i)^2}{\sum_{i=1}^{n_{\text{EXT}}} (y_i - \langle y_{\text{EXT}} \rangle)^2}$                                                                                                                                                                                                                       |
| $q_{\text{F3}}^2$       | $1 - \frac{\left[ \sum_{i=1}^{n_{\text{EXT}}} (y_i - \hat{y}_i)^2 / n_{\text{EXT}} \right]}{\left[ \sum_{i=1}^{n_{\text{TR}}} (y_i - \langle y_{\text{TR}} \rangle)^2 / n_{\text{TR}} \right]}$                                                                                                                                                          |
| CCC                     | $\frac{2 \sum_{i=1}^{n_{\text{EXT}}} (y_i - \langle y_{\text{EXT}} \rangle) (\hat{y}_i - \langle \hat{y}_{\text{EXT}} \rangle)}{\sum_{i=1}^{n_{\text{EXT}}} (y_i - \langle y_{\text{EXT}} \rangle)^2 + (\hat{y}_i - \langle \hat{y}_{\text{EXT}} \rangle)^2 + n_{\text{EXT}} (\langle y_{\text{EXT}} \rangle - \langle \hat{y}_{\text{EXT}} \rangle)^2}$ |

<sup>†</sup>where  $n$ ,  $n_{\text{TR}}$ ,  $n_{\text{EXT}}$ ,  $y_i$ ,  $\hat{y}_i$ ,  $\langle \hat{y} \rangle$ ,  $r_o^2$ ,  $k$ ,  $r_o'^2$ , represent the number of samples in the data set, the number of samples in the training set, the number of samples in the external set, the observed value, the predicted value, the average of predicted values, the correlation coefficient of the

regression line (predicted vs. observed values) through the origin, the slope of the regression line (predicted vs. observed values) through the origin, the correlation coefficient of the regression line (observed vs. predicted values) through the origin.

Table S2. Confusion matrix for qualitative predictive model.

|           |   | Observed            |                     |
|-----------|---|---------------------|---------------------|
|           |   | +                   | -                   |
| Predicted | + | true positive (TP)  | false positive (FP) |
|           | - | false negative (FN) | true negative (TN)  |

Table S3. The Cooper statistics and Kubat's G-mean calculated from the confusion matrix (Table S2)

| Parameter                              | Definition <sup>†</sup>                                                                                   |
|----------------------------------------|-----------------------------------------------------------------------------------------------------------|
| Sensitivity                            | $TP / (TP + FN)$                                                                                          |
| Specificity                            | $TN / (FP + TN)$                                                                                          |
| Accuracy                               | $(TP + TN) / N$                                                                                           |
| Matthews<br>Correlation<br>Coefficient | $\frac{TP \times TN - FP \times FN}{\sqrt{(TP + FP) \times (TP + FN) \times (TN + FP) \times (TN + FN)}}$ |
| G-mean                                 | $(Sensitivity \times Specificity)^{1/2}$                                                                  |

<sup>†</sup> $N = TP + TN + FP + FN.$

Table S4. Optimal runtime parameters for the SVM models.

| Model                    | SVM type           | Kernel type      | $\gamma$ | Cost                   | $\varepsilon$          |
|--------------------------|--------------------|------------------|----------|------------------------|------------------------|
| SVM-Pose <sup>1PB7</sup> | $\varepsilon$ -SVR | RBF <sup>†</sup> | 996      | $5.200 \times 10^{-3}$ | $2.500 \times 10^{-3}$ |
| SVM-Pose <sup>1PB8</sup> | $\varepsilon$ -SVR | RBF              | 320      | $7.813 \times 10^{-4}$ | $6.250 \times 10^{-3}$ |
| SVM-Pose <sup>1PB9</sup> | $\varepsilon$ -SVR | RBF              | 5000     | $6.250 \times 10^{-6}$ | $3.906 \times 10^{-3}$ |
| SVM-Pose <sup>1PBQ</sup> | $\varepsilon$ -SVR | RBF              | 5        | $3.125 \times 10^{-3}$ | $3.906 \times 10^{-3}$ |
| SVM-Pose <sup>1Y1M</sup> | $\varepsilon$ -SVR | RBF              | 4000     | $3.125 \times 10^{-5}$ | $7.813 \times 10^{-3}$ |
| SVM-Pose <sup>1Y1Z</sup> | $\varepsilon$ -SVR | RBF              | 312.5    | $1.563 \times 10^{-4}$ | $7.813 \times 10^{-3}$ |
| SVM-Pose <sup>1Y20</sup> | $\varepsilon$ -SVR | RBF              | 312.5    | $6.250 \times 10^{-6}$ | $3.906 \times 10^{-3}$ |
| SVM-Score                | $\varepsilon$ -SVR | RBF              | 15551    | $2.572 \times 10^{-4}$ | $1.850 \times 10^{-1}$ |

<sup>†</sup>Radial basis function

Table S5. Descriptors selected by 7 SVM-Pose models.

| Descriptor         | SVM-Pose |      |      |      |      |      |      | Description                                                                                              |
|--------------------|----------|------|------|------|------|------|------|----------------------------------------------------------------------------------------------------------|
|                    | 1PB7     | 1PB8 | 1PB9 | 1PBQ | 1Y1M | 1Y1Z | 1Y20 |                                                                                                          |
| $S$ (hb_ext)       | x        | x    | x    | x    | x    |      | x    | Protein-ligand<br>H-bond<br>contribution to<br><i>GoldScore</i> value                                    |
| $S$ (vdw_ext)      |          | x    | x    | x    | x    | x    |      | Protein-ligand<br>vdw contribution<br>to <i>GoldScore</i><br>value                                       |
| $S$<br>(vdw_int)   | x        | x    |      | x    | x    | x    | x    | Internal ligand<br>vdw contribution<br>to <i>GoldScore</i><br>value                                      |
| $S$ (tor_int)      | x        | x    |      | x    |      | x    | x    | Internal ligand<br>torsion-strain<br>contribution to<br><i>GoldScore</i> value                           |
| $\Delta G$         |          | x    | x    | x    | x    |      | x    | Free energy<br>change (that<br>occurs on ligand<br>binding)<br>contribution to<br><i>ChemScore</i> value |
| $S$ (hbond)        |          | x    | x    | x    |      |      | x    | Protein-ligand<br>H-bond<br>contribution to<br><i>ChemScore</i> value                                    |
| $S$ (lipo)         | x        | x    | x    | x    | x    |      | x    | Protein-ligand<br>lipophilic<br>contribution to<br>the <i>ChemScore</i><br>value                         |
| $\Delta E$ (clash) |          | x    | x    | x    | x    | x    | x    | Protein-ligand<br>clash penalty to<br>the <i>ChemScore</i>                                               |

|                  |   |   |   |   |   |   |       |                                                                        |
|------------------|---|---|---|---|---|---|-------|------------------------------------------------------------------------|
|                  |   |   |   |   |   |   | value |                                                                        |
| $\Delta E$ (int) | x | x |   | x | x |   | x     | Internal ligand torsional strain penalty to the <i>ChemScore</i> value |
| <i>LigScore1</i> |   | x | x | x |   | x |       |                                                                        |
| <i>LigScore2</i> | x |   | x | x | x | x | x     |                                                                        |
| <i>PLP</i>       | x |   | x | x | x | x | x     | Empirical scoring function                                             |
| <i>PLP2</i>      |   | x | x |   |   | x |       |                                                                        |
| <i>Jain</i>      | x | x | x | x | x | x |       |                                                                        |
| <i>LUDI2</i>     | x |   |   |   |   |   |       |                                                                        |
| <i>PMF</i>       |   | x | x | x |   | x | x     | Knowledge-based scoring function                                       |
| <i>PMF04</i>     |   |   | x |   | x | x |       |                                                                        |

---



Table S8. The correlation coefficients ( $r$ ) between selected descriptors and  $pK_i$  for specific chemotypes and the other molecules and between descriptors for all molecules enlisted in the SVM-Score development.

| $r$                                 | Molecules                        |            |
|-------------------------------------|----------------------------------|------------|
|                                     | Total ( $n = 37$ )               |            |
| HBD vs. <i>Gold.Chemscore.Hbond</i> | 0.782                            |            |
|                                     | Bound ligand ( $n = 7$ )         | The others |
| Atype_N_75 vs. HBA                  | 0.881                            | 0.318      |
|                                     | Total ( $n = 37$ )               |            |
| CIC1 vs. MR                         | 0.800                            |            |
|                                     | Unbound ligands ( $n = 30$ )     | The others |
| CC                                  | -0.622                           | 0.056      |
|                                     | Acetylenic aromatics ( $n = 5$ ) | The others |
| JGI4 vs. $pK_i$                     | 0.794                            | 0.264      |
|                                     | Bound ligand ( $n = 7$ )         | The others |
| S_ssCH <sub>2</sub> vs. $pK_i$      | -0.786                           | -0.071     |
| HATS6u vs. $pK_i$                   | -0.797                           | -0.294     |

Table S9. The observed  $pK_i$  values ( $[^3\text{H}]$ glycine) and predictive  $pK_i$  values ( $[^3\text{H}]$ MDL) for those molecules in the mock test.

| Molecule                                                        | $pK_i$ |       |
|-----------------------------------------------------------------|--------|-------|
|                                                                 | Obs.   | Pred. |
| Disodium;6,7-dinitroquinoxaline-2,3-diolate                     | 6.41   | 6.02  |
| 7,8-Dichloro-1-ethyl-5H-[1,2,4]triazolo[4,3-a]quinoxalin-4-one  | 5.34   | 3.57  |
| 7,8-Dichloro-1-propyl-5H-[1,2,4]triazolo[4,3-a]quinoxalin-4-one | 5.41   | 3.72  |
| 1-Butyl-7,8-dichloro-5H-[1,2,4]triazolo[4,3-a]quinoxalin-4-one  | 5.83   | 2.42  |
| 7,9-Dichloro-5H-[1,2,4]triazolo[4,3-a]quinoxalin-4-one          | 5.55   | 2.53  |
| Nitro-5H-[1,2,4]triazolo[4,3-a]quinoxalin-4-one                 | 5.13   | 3.68  |
| 7,8-Dinitro-5H-[1,2,4]triazolo[4,3-a]quinoxalin-4-one           | 5.29   | 3.18  |
| 7,8-Dichloro-5H-imidazo[1,2-a]quinoxalin-4-one                  | 5.90   | 3.91  |
| 6,7-Dichloroquinoxaline-2,3-dione                               | 6.68   | 4.99  |
| 5,7-Dichlorokynurenic acid                                      | 7.40   | 7.49  |

## Figure legends

**Figure S1.** Molecular distribution for unbound (circles) and unbound samples (triangles) in the training set (filled) and test set (open) in the chemical space spanned by three principal components.

**Figure S2.** Histograms of (a)  $pK_i$ , (b) area, (c) molecular volume ( $V_m$ ), and (d) molecular weight (MW) in density form for all molecules in the training set and test set.

**Figure S3.** Average  $pK_i$  versus the distribution of HBA for those bound ligands.

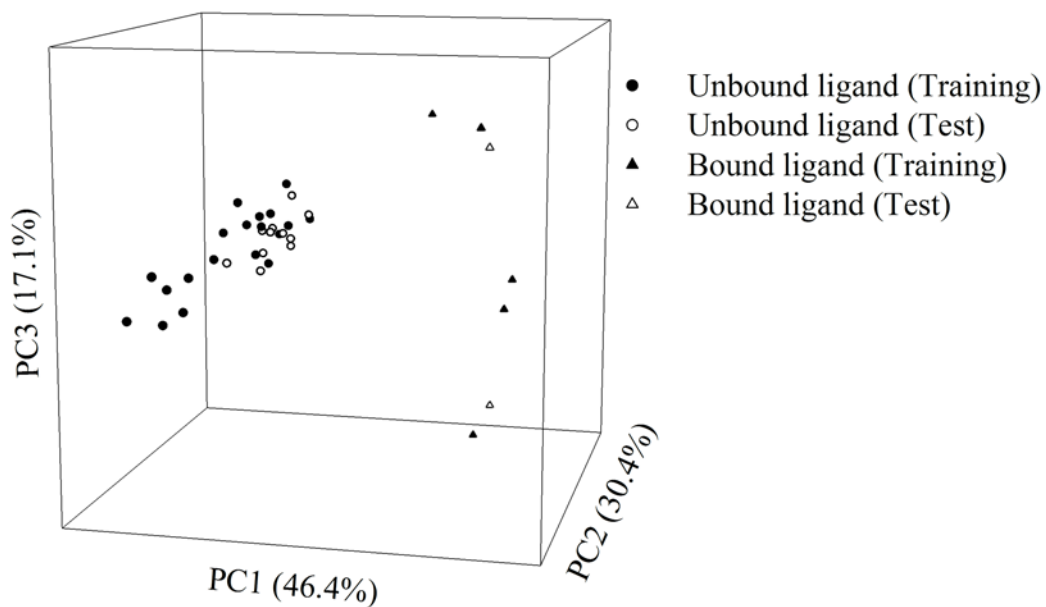

Figure S1. Molecular distribution for unbound (circles) and unbound samples (triangles) in the training set (filled) and test set (open) in the chemical space spanned by three principal components.

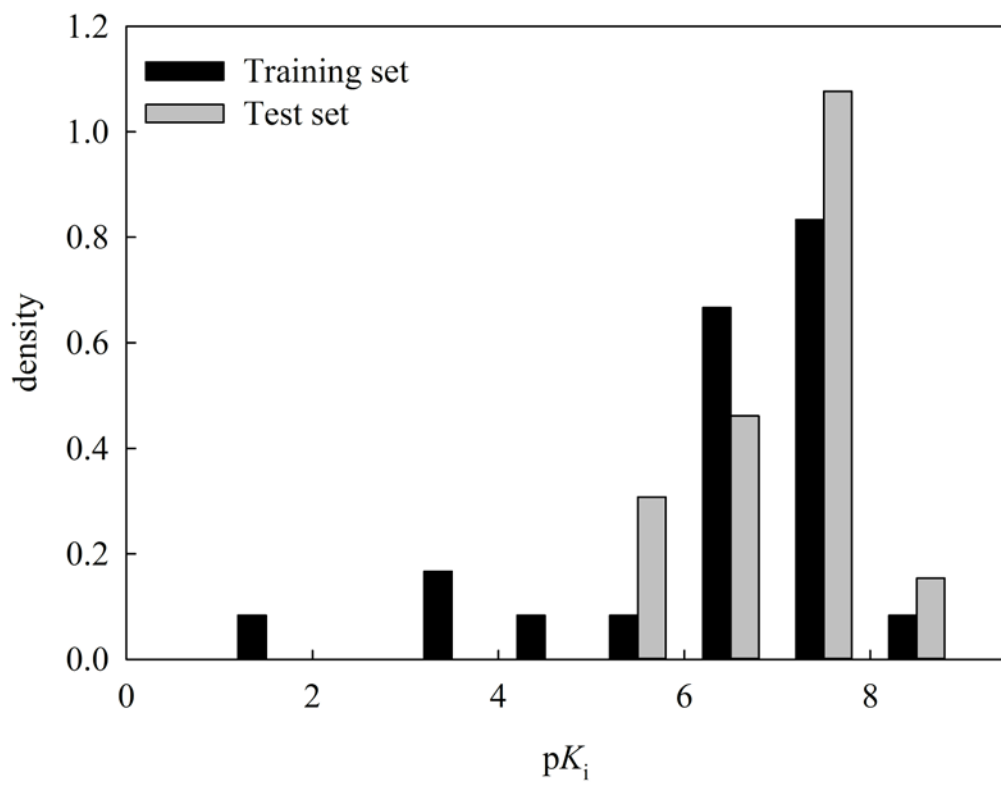

(a)

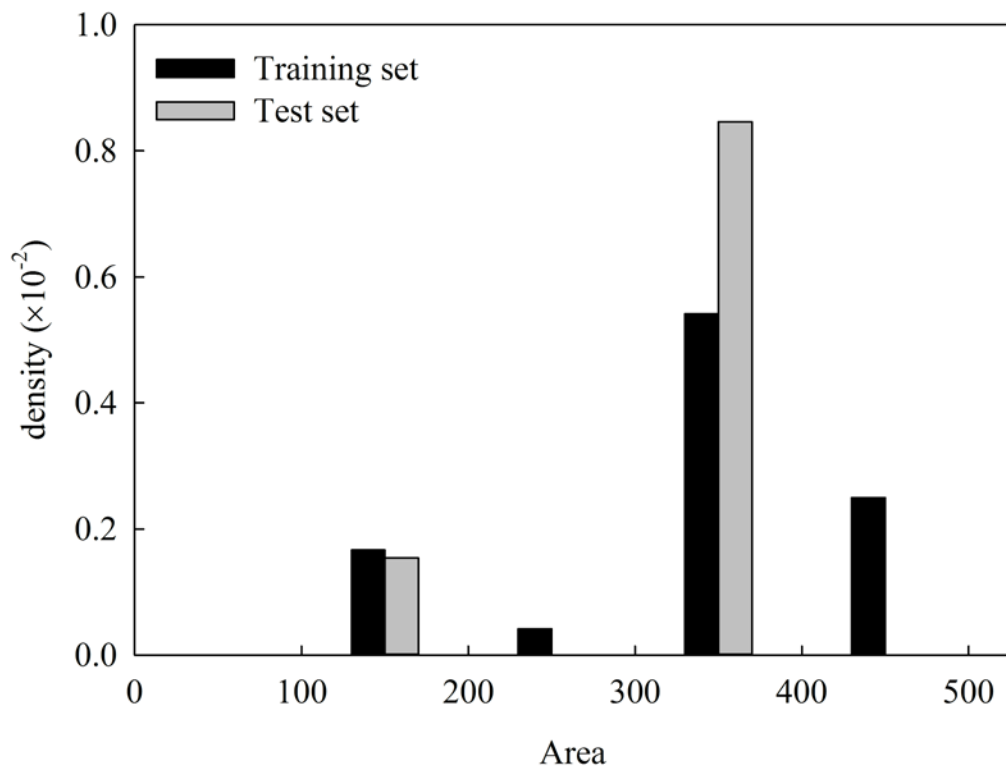

(b)

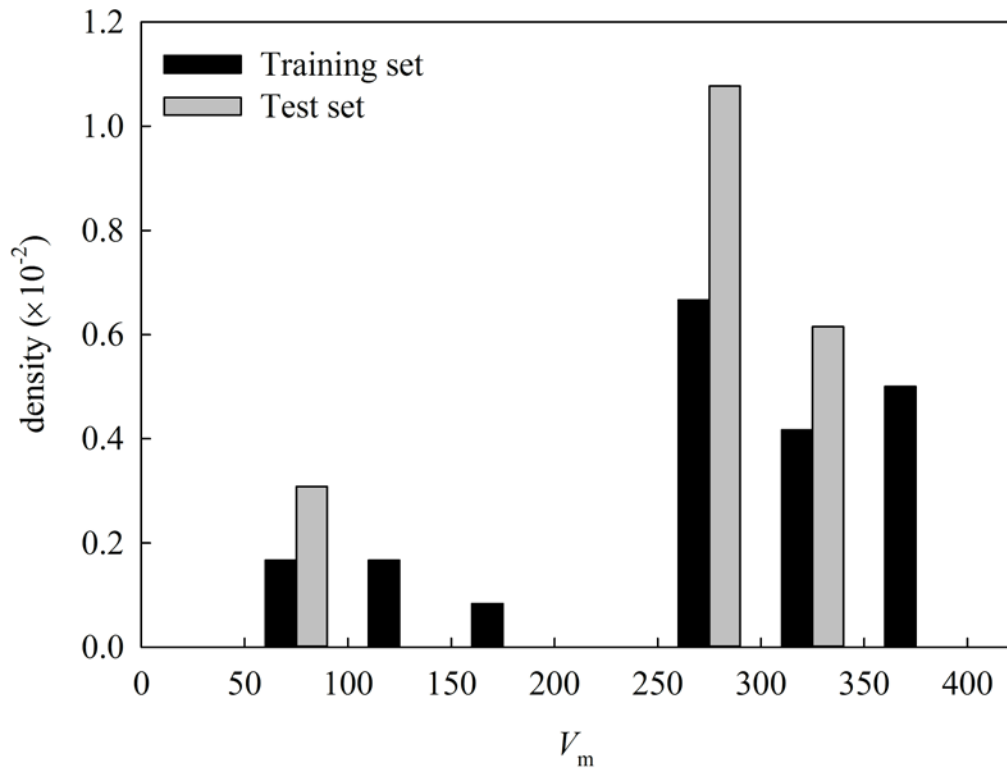

(c)

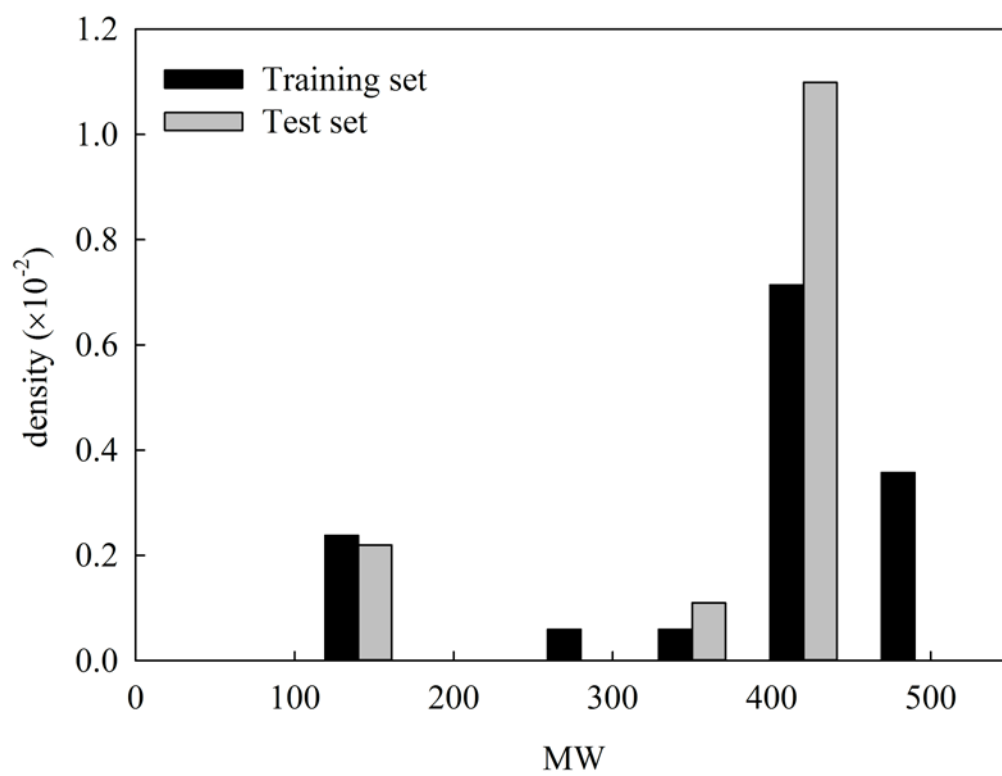

(d)

Figure S2. Histograms of (a)  $pK_i$ , (b) area, (c)  $V_m$ , and (d) MW in density form for all molecules in the training set and test set.



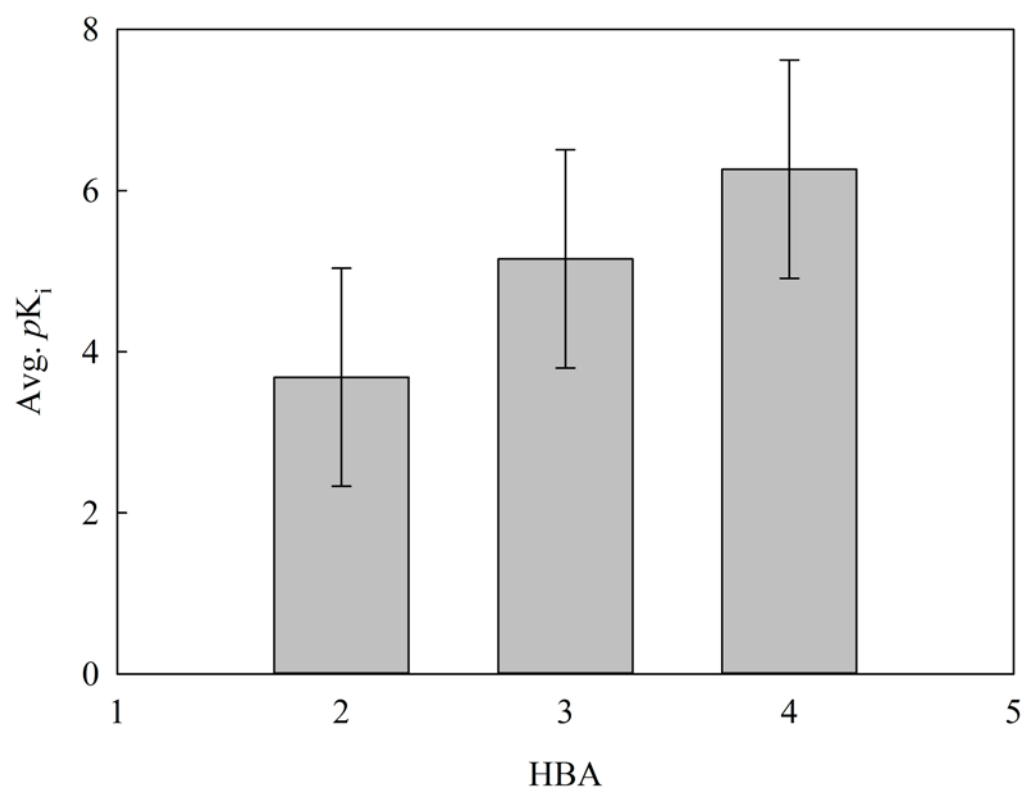

Figure S3. Average  $pK_i$  versus the distribution of HBA for those bound ligands.
